# Supplementary material for: Small Extracellular Vesicles from Peripheral Blood of Aged Mice Pass the Blood-Brain Barrier and Induce Glial Cell Activation
Source: MDPI journal article supplement (doi:10.3390/cells11040625), 2022-02-11

**Supplementary Figure S1.** Images of coronal brain slices acquired using automatic tiling and stitching tools of the Axio Observer microscope (Zeiss).

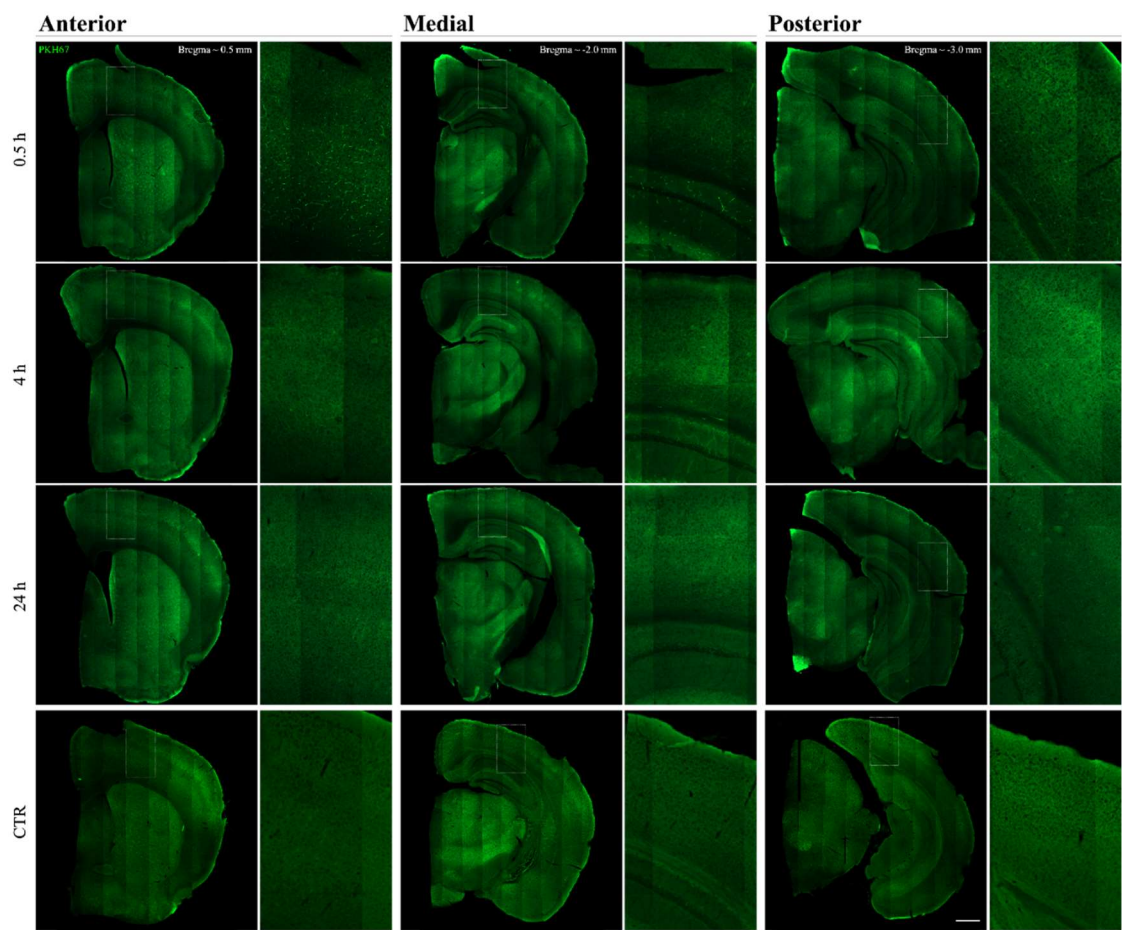

**Supplementary Figure S2.** Glial activation after sEV-old injection *in vivo*. **A)** Brains sections from non-treated (NTC) and sEV-old injected mice were immunostained following the protocol described in the methods section. Chicken anti-mouse GFAP antibody (**pseudo green**) (Encor, Cat-Nr. ABIN 4956156) and rabbit anti-mouse IBA1 antibody (**pseudo red**) (Wako, Cat-Nr. 016-20001) at a 1:500 dilution, and rhodamine donkey anti-chicken antibody and Alexafluor647 donkey anti-rabbit antibody at a 1:500 dilution were used. 1 µg/ml of DAPI was used for nuclei staining. Coronal sections in the medial brain (approximately in bregma -2.0 mm) of mouse cortex and hippocampus showing increased GFAP expression 24 h after injection of sEV-old compared to NTC. **B)** Magnification of the boxes in cortex and hippocampus showing amoeboid-like microglial somas (white arrowheads), and highly ramified morphology and thickening of astrocyte processes in the treated mouse compared to NTC. **C)** Summary of the GFAP and Iba1 fluorescence intensity from different areas of brain tissue (4 fields). Scale bar: A: 100 µm; B: 50 µm.



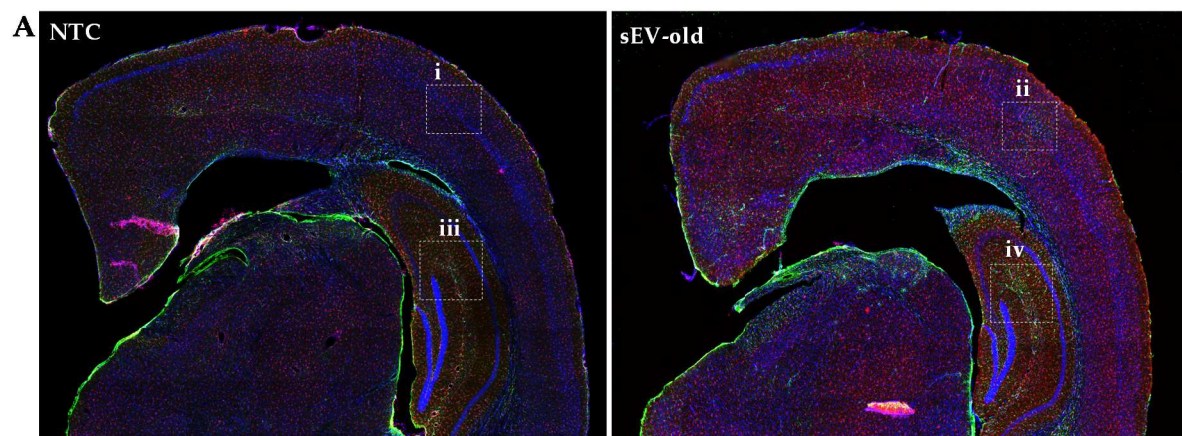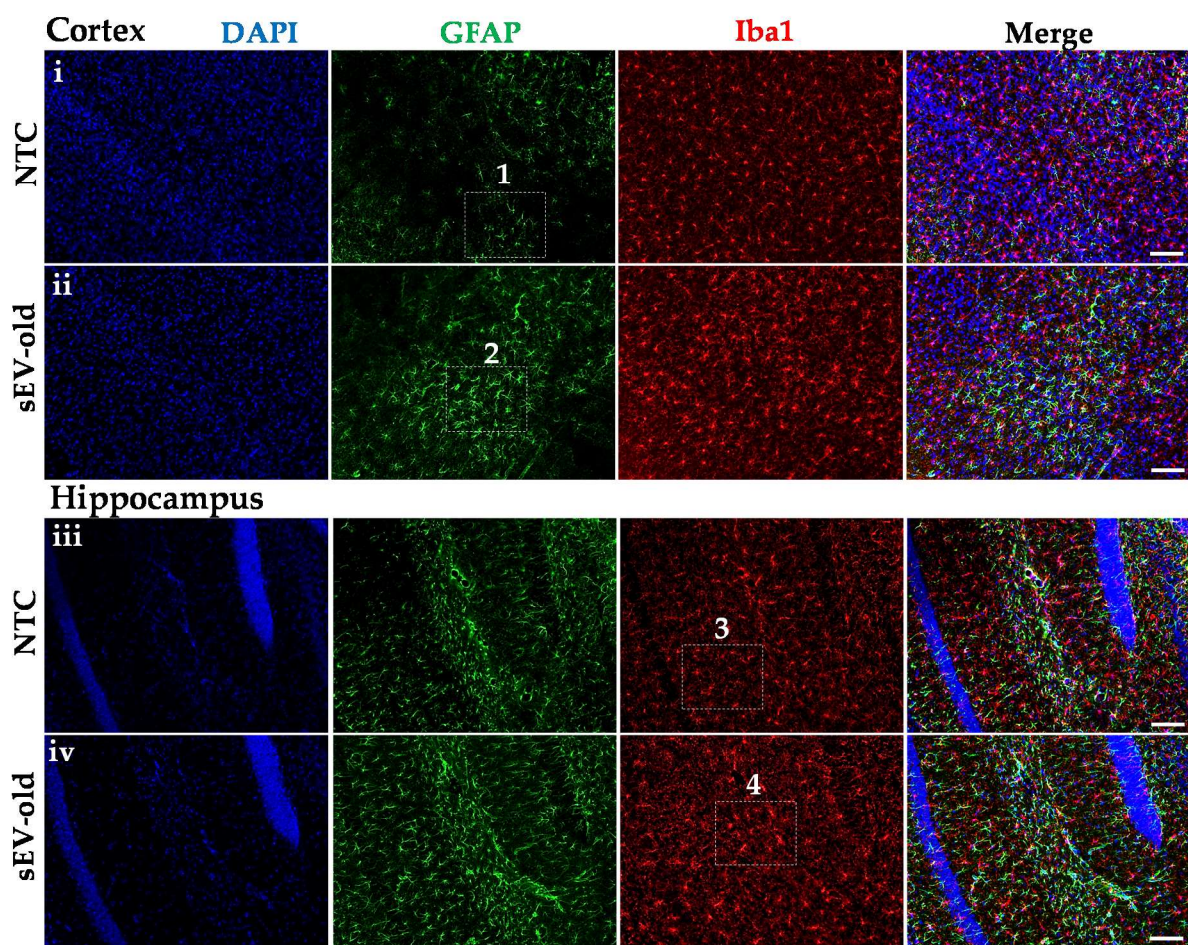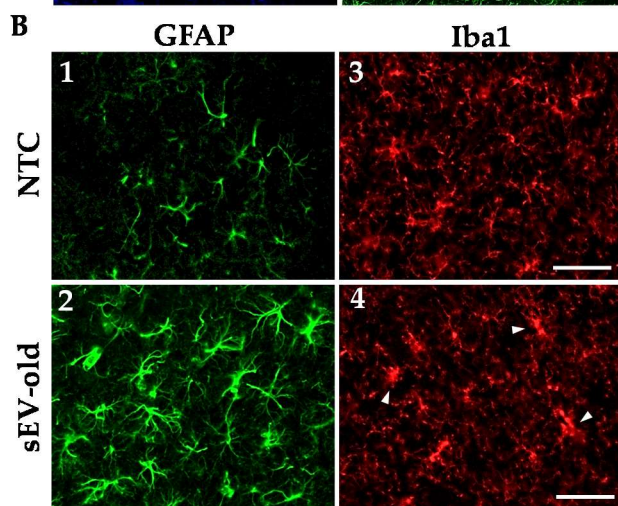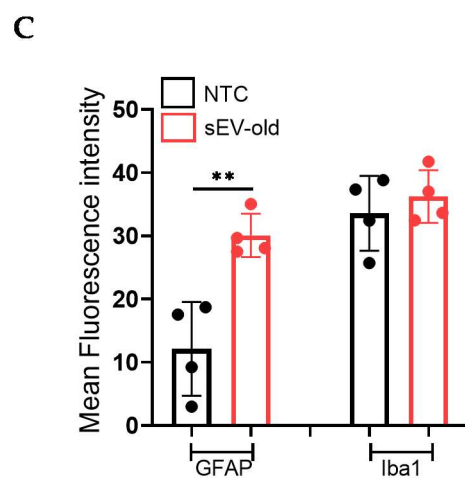

**Supplementary Figure S3.** Panel of investigated genes in liver tissue at 24 h after sEV administration.

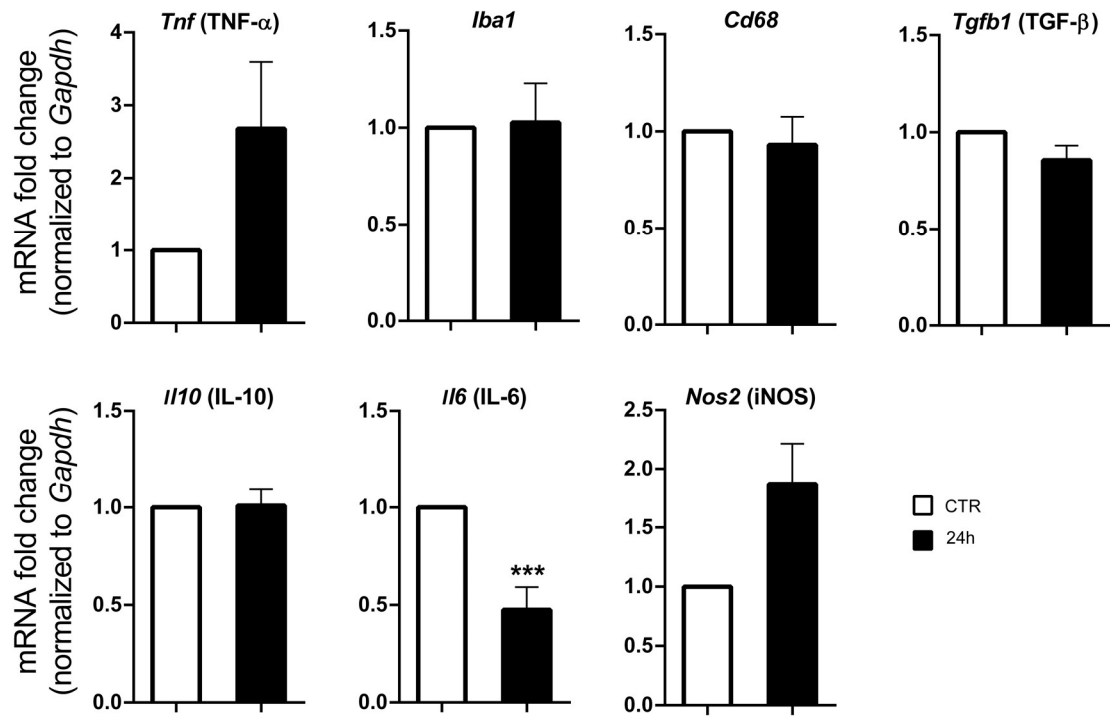

Supplement: s1 [file s1]
